# Supplementary material for: Crystallographic and Dynamic Aspects of Solid‐State NMR Calibration Compounds: Towards ab Initio NMR Crystallography
Source: PubMed Central journal article supplement — Chemphyschem. 2016 Jun 8;17(16):2496–502. doi: 10.1002/cphc.201600398 (PMC5096255; doi:10.1002/cphc.201600398), 2016-06-08
Supplement: CPHC-17-2496-s001.pdf [file CPHC-17-2496-s001.pdf]

# CHEMPHYSCHEM

## Supporting Information

### **Crystallographic and Dynamic Aspects of Solid-State NMR Calibration Compounds: Towards ab Initio NMR Crystallography**

Xiaozhou Li,<sup>[a]</sup> Lukas Tapmeyer,<sup>[b]</sup> Michael Bolte,<sup>[b]</sup> and Jacco van de Streek\*<sup>[a]</sup>

cphc\_201600398\_sm\_miscellaneous\_information.pdf

# Supporting Information for “Crystallographic and dynamics aspects of solid-state NMR calibration compounds: towards *ab initio* NMR crystallography”

Xiaozhou Li, Lukas Tapmeyer, Michael Bolte and Jacco van de Streek

|                 |   |
|-----------------|---|
| Table S1 .....  | 2 |
| Table S2 .....  | 2 |
| Table S3 .....  | 3 |
| Figure S1 ..... | 4 |
| Figure S2 ..... | 5 |
| Figure S3 ..... | 6 |

| Compound              | Method | Carbon              | Exp. CS [ppm] | Cal. CS [ppm] | Deviation [ppm] |
|-----------------------|--------|---------------------|---------------|---------------|-----------------|
| $\alpha$ -glycine     | MD     | CO                  | 176.5         | 169.1         | -7.4            |
|                       |        | CH <sub>2</sub>     | 43.7          | 46.9          | 3.2             |
| $\gamma$ -glycine     | MD     | CO                  | 173.4         | 163.6         | -9.8            |
|                       |        | CH <sub>2</sub>     | 41.4          | 52.5          | 11.1            |
| adamantane            | MD     | CH                  | 29.5          | 31.4          | 2.0             |
|                       |        | CH <sub>2</sub>     | 38.5          | 40.0          | 1.4             |
| hexamethylbenzene     | MD     | CH                  | 132.0         | 130.0         | -2.0            |
|                       |        | CH <sub>3</sub>     | 17.2          | 16.7          | -0.5            |
| 3-methylglutaric acid | MD     | COOH(1)             | 180.7         | 179.5         | -1.2            |
|                       |        | COOH(2)             | 181.6         | 180.3         | -1.3            |
|                       |        | CH <sub>2</sub> (1) | 38.3          | 40.5          | 2.2             |
|                       |        | CH <sub>2</sub> (2) | 39.5          | 43.5          | 3.9             |
|                       |        | CH                  | 25.2          | 24.7          | -0.6            |
|                       |        | CH <sub>3</sub>     | 18.8          | 17.9          | -1.0            |
| MAD [ppm]             | 3.4    |                     |               |               |                 |
| RMSD [ppm]            | 4.8    |                     |               |               |                 |
| Ref. shielding [ppm]  | 169.5  |                     |               |               |                 |

Table S1. Calculated and experimental chemical shifts of the five calibration phases when MD with the COMPASS force field was employed for the two polymorphs of glycine, which gave large distortions during the energy minimizations (see Figure S1). CS: chemical shift, MAD: mean-absolute deviation, RMSD: root-mean-square deviation.

| Compound              | Method | Carbon              | Exp. CS [ppm] | Cal. CS [ppm] | Deviation [ppm] |
|-----------------------|--------|---------------------|---------------|---------------|-----------------|
| $\alpha$ -glycine     | DFT-D  | CO                  | 176.5         | 179.2         | 2.7             |
|                       |        | CH <sub>2</sub>     | 43.7          | 41.7          | -2.0            |
| $\gamma$ -glycine     | DFT-D  | CO                  | 173.4         | 176.3         | 2.9             |
|                       |        | CH <sub>2</sub>     | 41.4          | 40.0          | -1.4            |
| adamantane            | MD     | CH                  | 29.5          | 30.8          | 1.3             |
|                       |        | CH <sub>2</sub>     | 38.5          | 39.3          | 0.8             |
| hexamethylbenzene     | MD     | CH                  | 132.0         | 129.3         | -2.7            |
|                       |        | CH <sub>3</sub>     | 17.2          | 16.0          | -1.2            |
| 3-methylglutaric acid | DFT-D  | COOH(1)             | 180.7         | 186.3         | 5.6             |
|                       |        | COOH(2)             | 181.6         | 186.5         | 4.8             |
|                       |        | CH <sub>2</sub> (1) | 38.3          | 36.7          | -1.7            |
|                       |        | CH <sub>2</sub> (2) | 39.5          | 36.8          | -2.7            |
|                       |        | CH                  | 25.2          | 22.7          | -2.6            |
|                       |        | CH <sub>3</sub>     | 18.8          | 14.9          | -3.9            |
| MAD [ppm]             | 2.6    |                     |               |               |                 |
| RMSD [ppm]            | 2.9    |                     |               |               |                 |
| Ref. Shielding [ppm]  | 168.8  |                     |               |               |                 |

Table S2. Calculated and experimental chemical shifts when using the DFT-D energy minimized 3-methylglutaric acid to fit with the other four calibration phases. CS: chemical shift, MAD: mean-absolute deviation, RMSD: root-mean-square deviation.

|                                                                                          |                       | <i>a</i> [Å] | <i>b</i> [Å] | <i>c</i> [Å] | $\alpha$ [°] | $\beta$ [°] | $\gamma$ [°] | Volume [Å <sup>3</sup> ] |
|------------------------------------------------------------------------------------------|-----------------------|--------------|--------------|--------------|--------------|-------------|--------------|--------------------------|
| Adamantane<br>Space group: <i>Fm</i> $\bar{3}m$<br><i>Z</i> = 4                          | Experiment            | 9.445        | 9.445        | 9.445        | 90           | 90          | 90           | 842.570                  |
|                                                                                          | 1 × 1 × 1 MD          | 9.583        | 9.583        | 9.583        | 90           | 90          | 90           | 879.906                  |
|                                                                                          | $\Delta$ [%]          | 1.461        | 1.461        | 1.461        |              |             |              | 4.431                    |
| Hexamethylbenzene<br>Space group: <i>P</i> $\bar{1}$<br><i>Z</i> = 1                     | Experiment            | 5.300        | 6.272        | 8.098        | 103.837      | 99.451      | 99.584       | 251.806                  |
|                                                                                          | 2 × 2 × 2 MD          | 5.262 × 2    | 6.524 × 2    | 8.066 × 2    | 105.524      | 99.250      | 96.806       | 259.514                  |
|                                                                                          | $\Delta$ [%]          | -0.717       | 4.018        | -0.395       | 1.625        | -0.202      | -2.790       | 3.061                    |
| $\alpha$ -Glycine<br>Space group: <i>P</i> 2 <sub>1</sub> / <i>n</i><br><i>Z</i> = 4     | Experiment            | 5.010        | 11.952       | 5.459        | 90           | 111.781     | 90           | 309.005                  |
|                                                                                          | 1 × 1 × 1 MD          | 4.947        | 15.220       | 5.300        | 90           | 119.811     | 90           | 346.248                  |
|                                                                                          | $\Delta$ [%]          | -1.257       | 27.343       | -2.913       |              | 7.184       |              | 12.053                   |
| $\gamma$ -Glycine<br>Space group: <i>P</i> 3 <sub>1</sub><br><i>Z</i> = 3                | Experiment            | 7.038        | 7.038        | 5.481        | 90           | 90          | 120          | 235.153                  |
|                                                                                          | 1 × 1 × 1 MD          | 8.460        | 8.437        | 4.250        | 88.041       | 94.131      | 120.101      | 261.784                  |
|                                                                                          | $\Delta$ [%]          | 20.205       | 19.878       | -22.459      | -2.177       | 4.590       | 0.084        | 11.325                   |
| 3-Methylglutaric acid<br>Space group: <i>P</i> 2 <sub>1</sub> / <i>c</i><br><i>Z</i> = 4 | Experiment<br>(293 K) | 13.909       | 5.367        | 10.307       | 90           | 110.554     | 90           | 720.4                    |
|                                                                                          | 1 × 1 × 1 MD          | 13.962       | 5.309        | 10.456       | 90           | 110.754     | 90           | 724.751                  |
|                                                                                          | $\Delta$ [%]          | 0.381        | -1.081       | 1.446        |              | 0.181       |              | 0.605                    |

Table S3. Experimental lattice parameters and averaged lattice parameters from the MD simulations with the COMPASS force field.

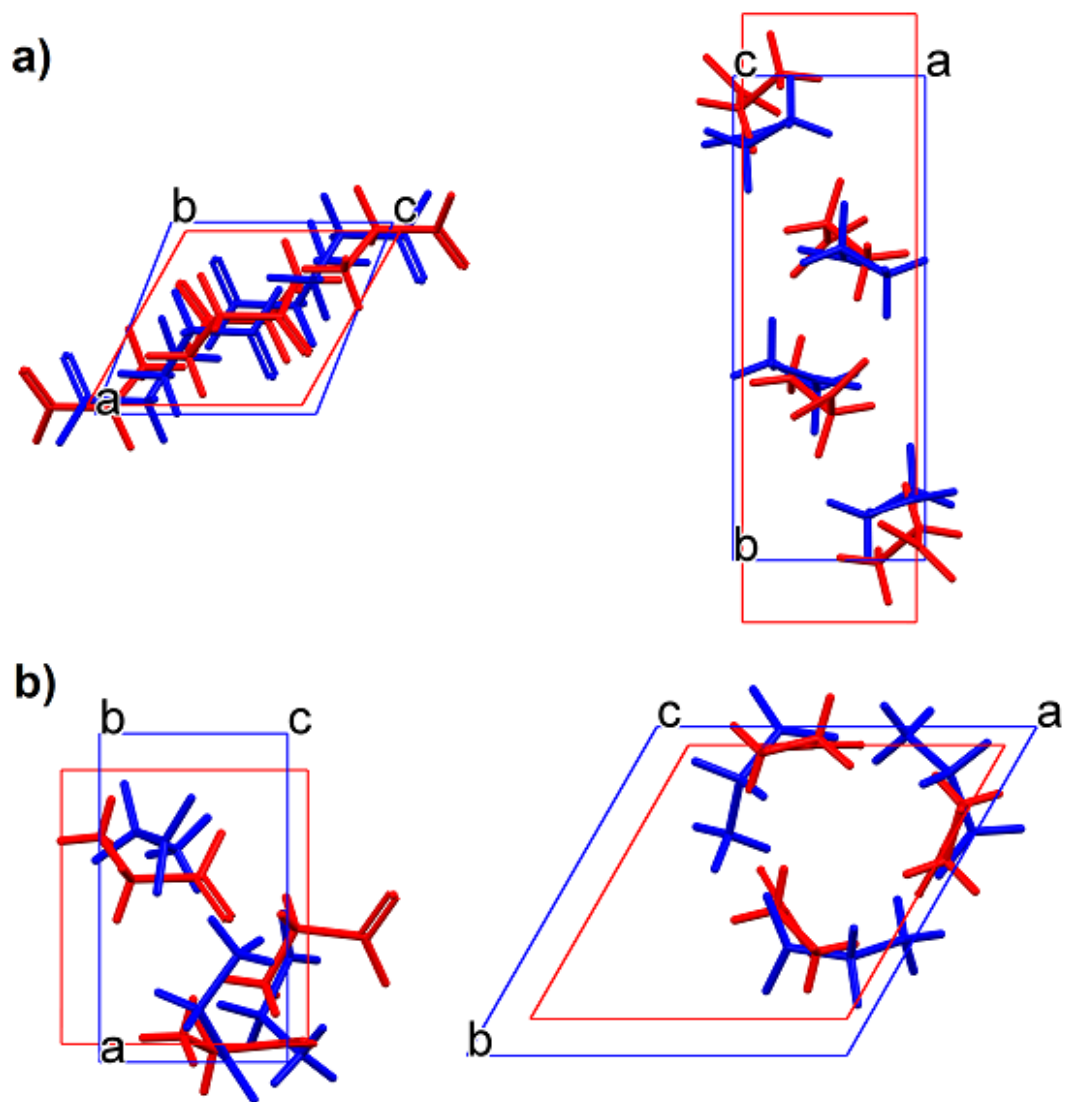

Figure S1. Overlays of the COMPASS force field energy minimized (blue) and the experimental (red) structures for a) the  $\alpha$ -polymorph of glycine and b) the  $\gamma$ -polymorph of glycine. Large distortions can be identified in the energy minimizations.

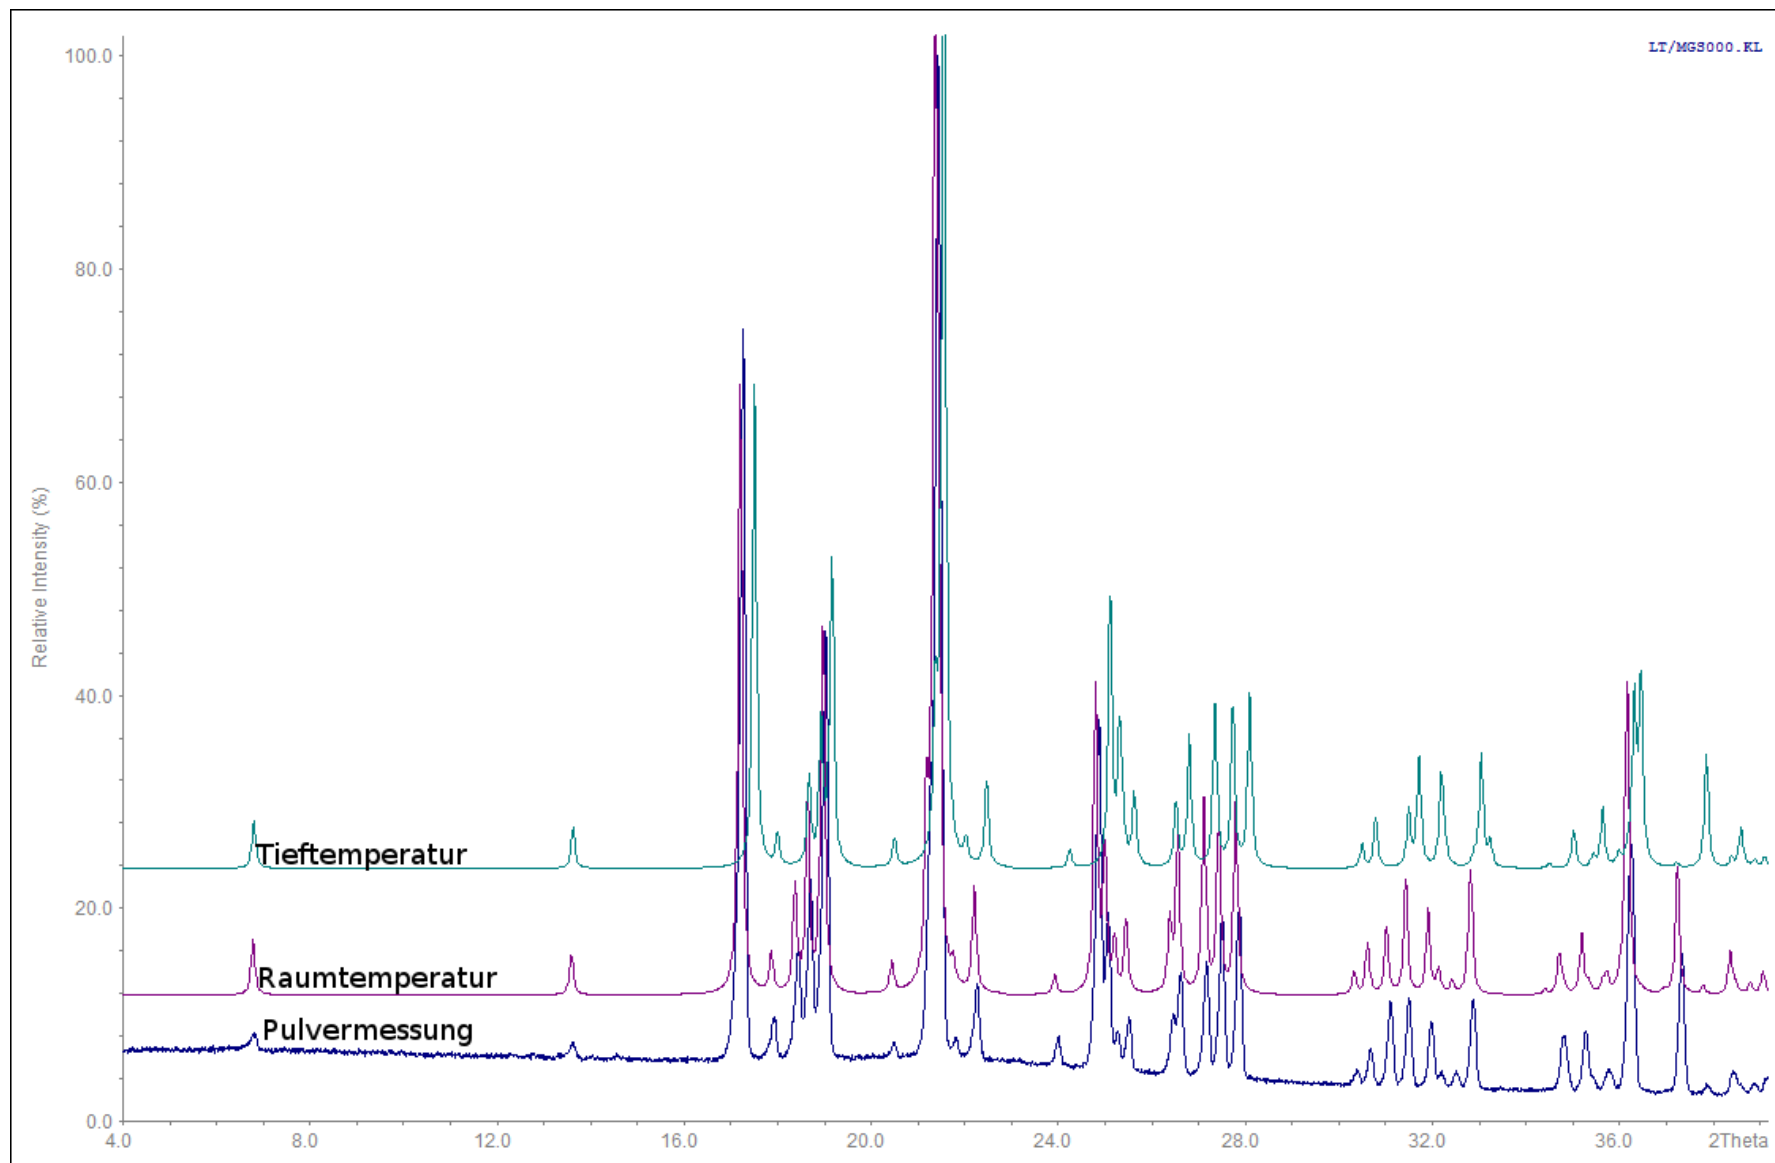

Figure S2. The X-ray powder diffraction patterns of 3-methylglutaric acid. From the top to the bottom: (1) Calculated pattern of the low-temperature structure (Tieftemperatur); (2) Calculated pattern of the room-temperature structure (Raumtemperatur) and (3) the experimentally measured pattern at room-temperature (Pulvermessung).

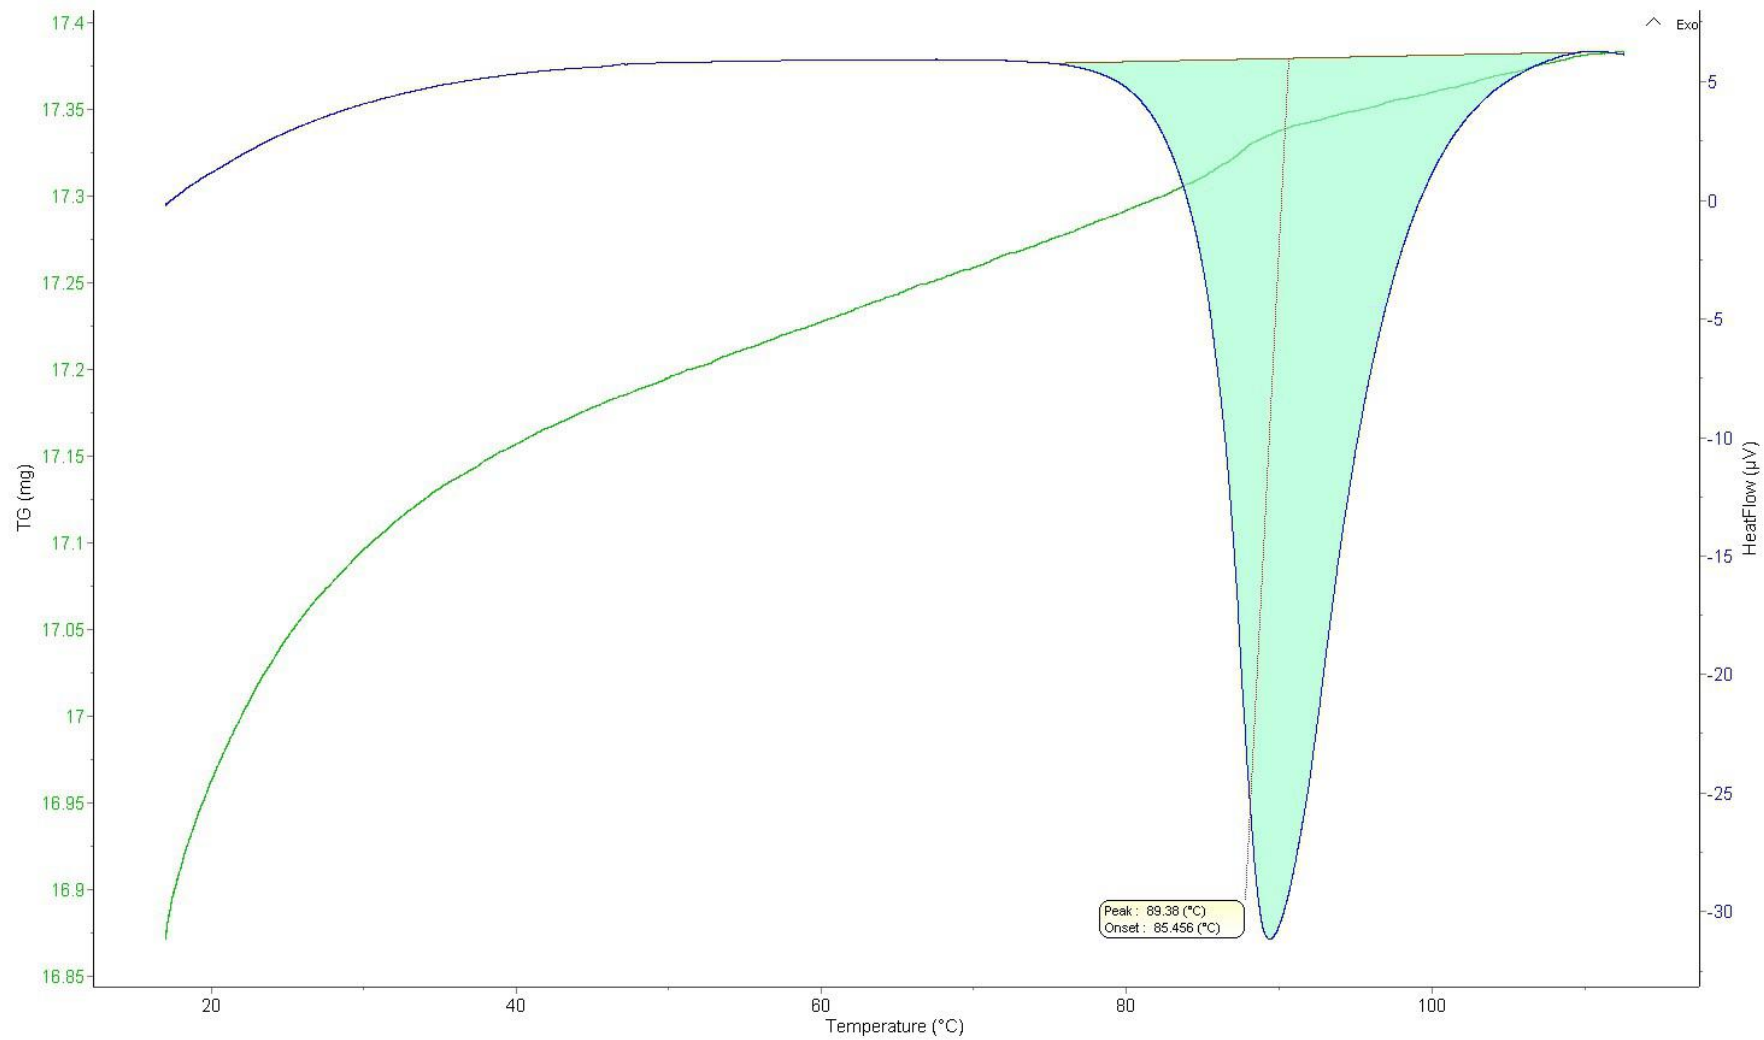

Figure S3. The differential thermal analysis (DTA) and thermo-gravimetric analysis (TGA) pattern of the purchased sample of 3-methylglutaric acid.
